# Supplementary material for: Involvement of HIF-1/Trf/Fe2+ signaling pathway in the Pathogenesis of Stanford Type A Aortic Dissection
Source: Research Square preprint supplement (doi:10.21203/rs.3.rs-7845557/v1), 2025-12-08

Supplementary materials

Table 1. The sequences of primers.

| Prime name | | Sequence (5’~3’) |
| --- | --- | --- |
| Human GAPDH | Sence primer | GGAAGCTTGTCATCAATGGAAATC |
| Antisence primer | TGATGACCCTTTTGGCTCCC |
| Human HIF-1 | Sence primer | GCTCATCAGTTGCCACTTCCAC |
| Antisence primer | CCAAATCACCAGCATCCAGAAG |
| Human CD71 | Sence primer | TTTCCACCATCTCGGTCATC |
| Antisence primer | GCTTCACATTCTTGCTTTCTGAG |
| Human GPX4 | Sence primer | TGAAGATCCAACCCAAGGGC |
| Antisence primer | GACGGTGTCCAAACTTGGTG |

The first results of Western blot:Control(n=7), AD(n=7)
β-actin:


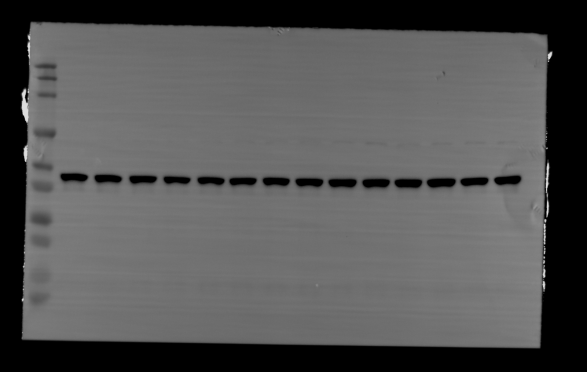


GPX4:


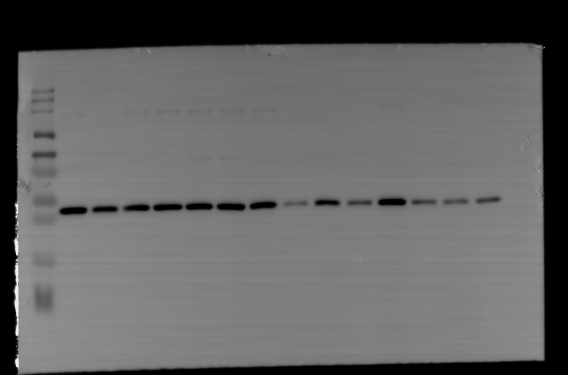


SLC7A11:


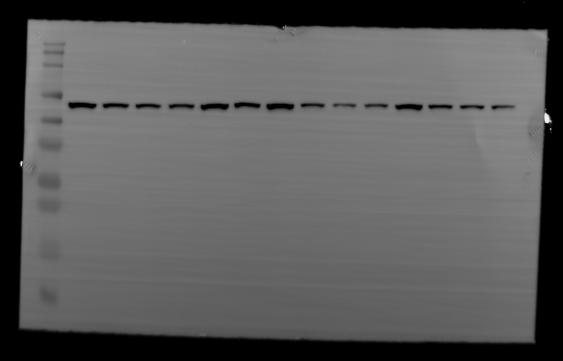


Ɑ-SMA:


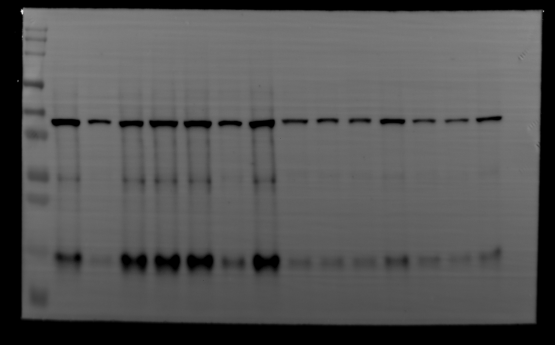


The second results of Western blot: AD(n=7),Control (n=7)

HIF-1:


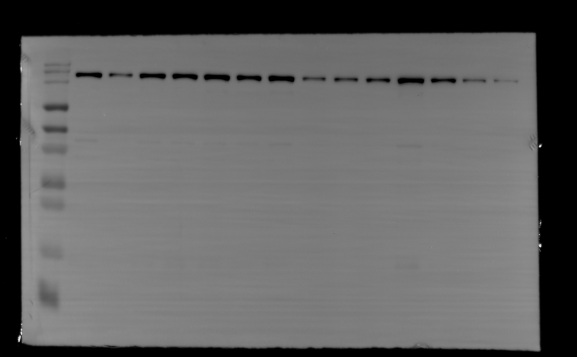


CD71:


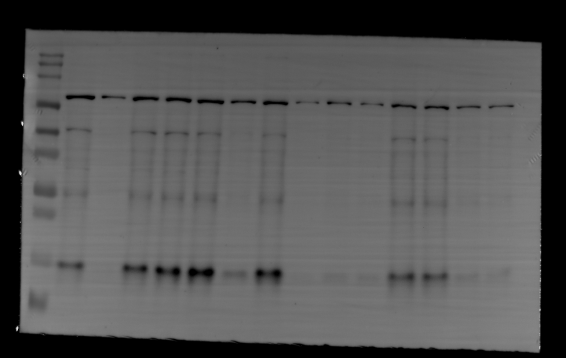

Supplement: Supplementary file 1 [file 8510100c51a5708ea8970107.docx]
